# Supplementary material
Source: PubMed Central journal article supplement (PMC3196813)
Supplement: NIHMS305732-supplement-Suppl2.pdf [file NIHMS305732-supplement-Suppl2.pdf]

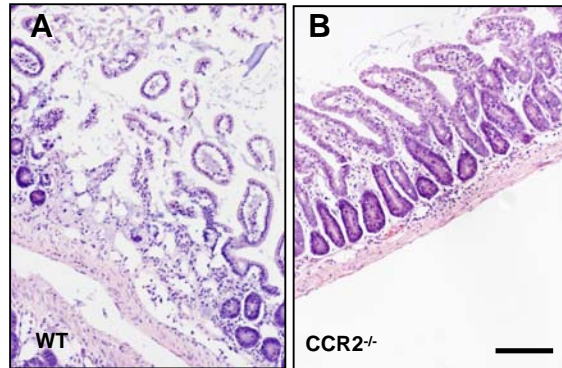

Figure S1. Egan et al.

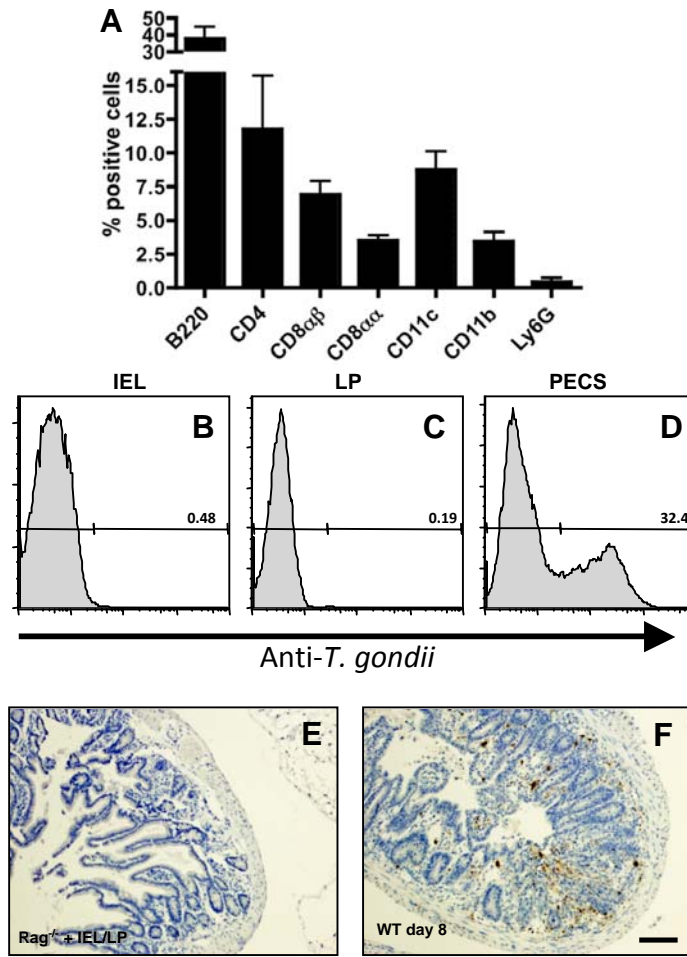

Figure S2. Egan et al.

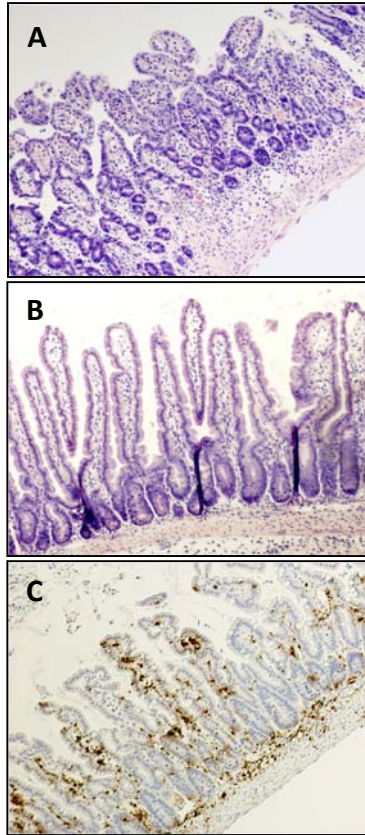

Figure S3. Egan et al.

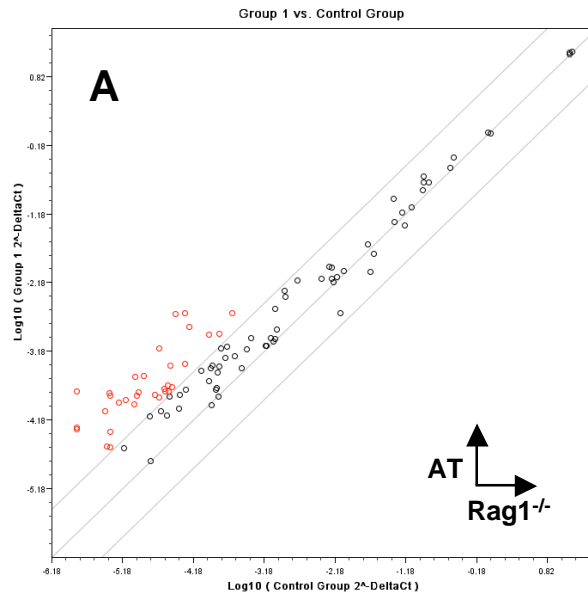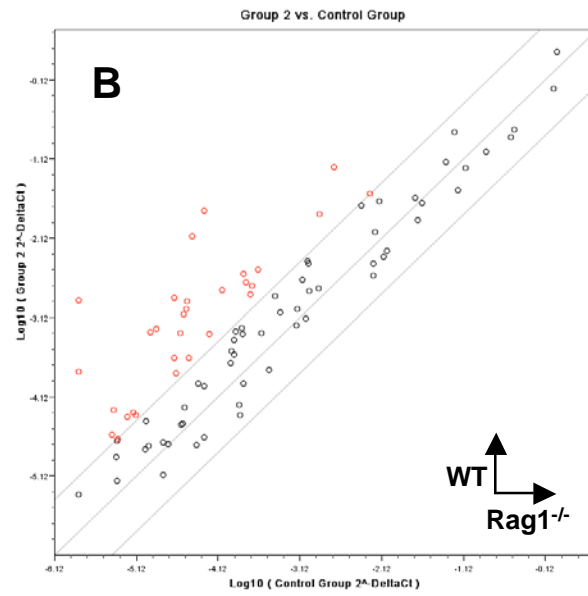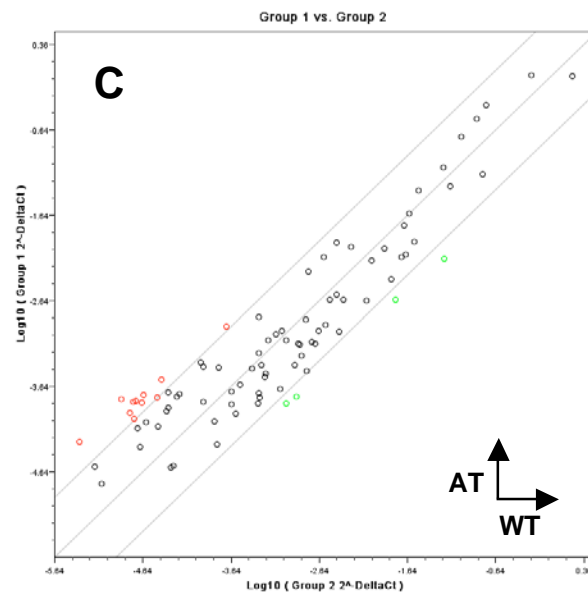

Figure S4. Egan et al.

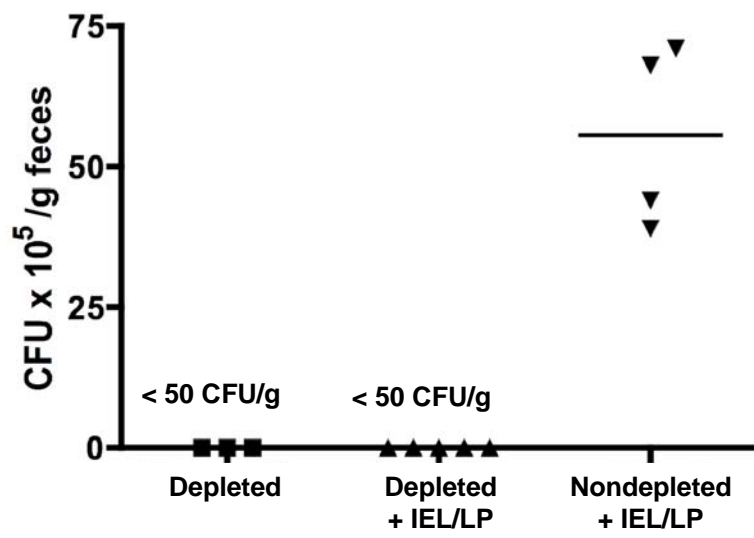

Figure S5. Egan et al.

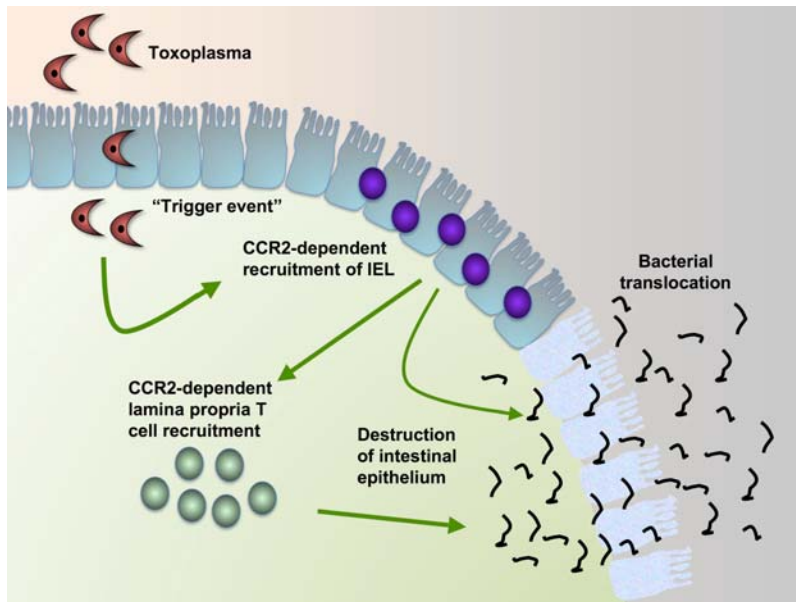

Figure S6. Egan et al.
